# Supplementary material for: Glucose and Fat Tolerance Tests Induce Differential Responses in Plasma Choline Metabolites in Healthy Subjects
Source: PubMed Central journal article supplement (PMC6165136; doi:10.3390/nu10091209), 2018-09-01
Supplement: nutrients-10-01209-s001.pdf [file nutrients-10-01209-s001.pdf]

## Supplemental Data Files

### Glucose and Fat Tolerance Tests Induce Differential Responses in Plasma Choline Metabolites in Healthy Subjects

**Supplemental Table 1.** Nutritional values of the milk cream (Landliebe®) presented in 100 g cream (as declared by the manufacturer).

|                                 |                             |
|---------------------------------|-----------------------------|
| Total energy                    | 1298 kj                     |
| Total calories                  | 310 kcal                    |
| Protein                         | 2.4 g (3% of total energy)  |
| Carbohydrates                   | 3.2 g (4% of total energy)  |
| of these sugar                  | 3 g                         |
| Fats as unsaturated fatty acids | 32 gr (93% of total energy) |
|                                 | 21.0 gr                     |
| Fiber                           | 0                           |
| Water                           | 55%                         |

Supplemental Data Files

**Supplemental Table 2.** Stepwise multiple regression analysis was applied to find predictors of plasma glucose, triglycerides and TMAO following OGTT or OFTT.

| Dependent variable                      | Adjusted R <sup>2</sup> | Constant | Independent variables with a significant influence | Beta coefficient (95%CI) | <i>p</i> |
|-----------------------------------------|-------------------------|----------|----------------------------------------------------|--------------------------|----------|
| Plasma glucose after OGTT, mmol/L       | 0.607                   | 15.9     | HDL-cholesterol, mmol/L                            | -2.59 (-3.75,-1.42)      | <0.001   |
|                                         |                         |          | W/H ratio                                          | -7.3 (-11.5,-3.1)        | 0.002    |
| Plasma TMAO after OGTT, μmol/L          | 0.843                   | -0.237   | TMAO pre-OGTT, μmol/L                              | 0.94 (0.72,1.15)         | <0.001   |
| Plasma triglycerides after OFTT, mmol/L | 0.861                   | 0.107    | Triglycerides pre-OFTT, mmol/L                     | 1.92 (1.45,2.39)         | <0.001   |
|                                         |                         |          | Cholesterol pre-OFTT, mmol/L                       | 0.31 (0.02,0.59)         | 0.037    |
|                                         |                         |          | GFR, ml. min <sup>-1</sup> . 1.73m <sup>2</sup>    | -0.020 (-0.038,-0.002)   | 0.029    |
| Plasma glucose after OFTT, mmol/L       | 0.582                   | 2.06     | Glucose pre-OFTT, mmol/L                           | 0.55 (0.29,0.82)         | <0.001   |
|                                         |                         |          | SAH pre-OFTT, nmol/L                               | -0.029 (-0.052,-0.005)   | 0.020    |
| Plasma TMAO after OFTT, μmol/L (log)    | 0.673                   | 0.321    | TMAO pre-OFTT, μmol/L (log)                        | 1.14 (0.70,1.58)         | 0.004    |
|                                         |                         |          | Dimethylglycine pre-OFTT, μmol/L                   | -0.16 (-0.26,-0.06)      | <0.001   |

All linear regression models included the following independent variables: sex (men = 0, women = 1), age, BMI, waist/hip ratio, in addition to concentrations of all plasma baseline markers that were measured before applying the corresponding tolerance test.

**Supplemental Table 3.** Comparisons of baseline (8 hrs fasting) plasma metabolites measured before applying OFTT and before applying OGTT (one week later).

|                         | Before OFTT (baseline) | Before OGTT (baseline) | <i>p</i> |
|-------------------------|------------------------|------------------------|----------|
| Free choline, μmol/L    | 10.6 (2.3)             | 10.1 (2.5)             | 0.139    |
| Betaine, μmol/L         | 33.4 (9.2)             | 34.3 (9.8)             | 0.585    |
| Dimethylglycine, μmol/L | 2.0 (0.9)              | 2.0 (0.8)              | 0.955    |
| TMAO, μmol/L            | 4.1 (2.3)              | 4.0 (2.1)              | 0.794    |
| Glucose, mmol/L         | 5.39 (0.44)            | 5.36 (0.42)            | 0.125    |
| SAM, nmol/L             | 100 (17)               | 103 (18)               | 0.385    |
| SAH, nmol/L             | 17.0 (4.9)             | 15.4 (5.3)             | 0.170    |

Data are mean (SD). N = 18 individuals participated in this test. P values are according to paired t-test. Conversion factors to SI units: glucose 1 mmol/L = 18.018 mg/dl OGTT, oral glucose tolerance test; OFTT, oral fat tolerance test; SAH, S-adenosylhomocysteine; SAM, S-adenosylmethionine; TMAO, trimethylamine N-oxide.

## Supplemental Data Files

**Supplemental Table 4.** Plasma concentrations of choline metabolites, glucose, and lipids at baseline and after applying OFTT according to sex.

| Plasma biomarkers          | In men                  |                    |                | In women                |                    |                | P <sup>1</sup> | P <sup>2</sup> between sex (baseline) | p <sup>2</sup> between sex (after OFTT) |
|----------------------------|-------------------------|--------------------|----------------|-------------------------|--------------------|----------------|----------------|---------------------------------------|-----------------------------------------|
|                            | Baseline OFTT (fasting) | After OFTT (4 hrs) | p <sup>1</sup> | Baseline OFTT (fasting) | After OFTT (4 hrs) | P <sup>1</sup> |                |                                       |                                         |
| Free choline, μmol/L       | 12.0±1.6                | 10.9±2.2           | 0.132          | 9.5±2.1                 | 7.8±1.3            | 0.010          | 0.014          | 0.001                                 |                                         |
| Betaine, μmol/L            | 39.2 ±8.1               | 37.6±8.5           | 0.057          | 28.7±7.0                | 26.9±7.0           | 0.025          | 0.010          | 0.009                                 |                                         |
| Dimethylglycine, μmol/L    | 2.0±1.1                 | 2.0±1.2            | 0.388          | 1.9±0.7                 | 1.9±0.6            | 0.995          | 0.359          | 0.265                                 |                                         |
| TMAO <sup>3</sup> , μmol/L | 3.8±1.1                 | 6.1±5.2            | 0.267          | 4.4±3.1                 | 5.2±3.3            | 0.268          | 0.992          | 0.729                                 |                                         |
| SAM, nmol/L                | 101±20                  | 101±20             |                | 99±14                   | 98±14              |                | 0.937          | 0.807                                 |                                         |
| SAH, nmol/L                | 20.0±5.4                | 20.8±5.4           |                | 14.5±2.9                | 12.3±5.1           |                | 0.015          | 0.002                                 |                                         |

Data are mean ± SD. N = 10 women and 8 men. <sup>1</sup>P values are according to paired t-test within each sex. <sup>2</sup> Men and women were compared by using ANOVA test. <sup>3</sup>TMAO concentrations were log-transformed before applying t-test. OFTT, oral fat tolerance test; TMAO, trimethylamine N-oxide. .

**Supplemental Table 5.** Plasma concentrations of choline metabolites, glucose, and lipids at baseline and after applying OGTT according to sex.

| Plasma biomarkers          | In men                  |                    |                | In women                |                    |                | P <sup>1</sup> | P <sup>2</sup> between sex (baseline) | p <sup>2</sup> between sex (after OGTT) |
|----------------------------|-------------------------|--------------------|----------------|-------------------------|--------------------|----------------|----------------|---------------------------------------|-----------------------------------------|
|                            | Baseline OGTT (fasting) | After OGTT (2 hrs) | p <sup>1</sup> | Baseline OGTT (fasting) | After OGTT (2 hrs) | P <sup>1</sup> |                |                                       |                                         |
| Free choline, μmol/L       | 11.1 ±2.4               | 12.4±2.8           | 0.011          | 9.2±2.3                 | 10.0±2.2           | 0.007          | 0.111          | 0.064                                 |                                         |
| Betaine, μmol/L            | 42.7±7.1                | 41.7±7.4           | 0.679          | 27.2±5.1                | 27.6±5.9           | 0.575          | <0.001         | 0.001                                 |                                         |
| Dimethylglycine, μmol/L    | 2.1±1.3                 | 1.7±1.1            | 0.027          | 2.0±0.4                 | 1.7±0.5            | 0.114          | 0.798          | 0.898                                 |                                         |
| TMAO <sup>3</sup> , μmol/L | 3.8±1.5                 | 3.3±1.2            | 0.006          | 4.1±2.6                 | 3.7±2.7            | 0.113          | 0.752          | 0.697                                 |                                         |
| SAM, nmol/L                | 105±23                  | 101±20             | 0.236          | 101±13                  | 92±13              | 0.101          | 0.634          | 0.244                                 |                                         |
| SAH, nmol/L                | 18.6±6.3                | 16.9±5.4           | 0.149          | 12.9±2.5                | 12.9±4.7           | 0.996          | 0.017          | 0.112                                 |                                         |

Data are mean ± SD. N = 10 women and 8 men. <sup>1</sup>P values are according to paired t-test within each sex. <sup>2</sup> Men and women were compared by using ANOVA test. <sup>3</sup>TMAO concentrations were log-transformed before applying t-test. OGTT, oral glucose tolerance test; TMAO, trimethylamine N-oxide.

## Supplemental Data Files

**Supplemental Table 6.** Post-hoc calculations of sample size needed to show significant differences in TMAO according to the mean and SD observed in the present study. The power calculations were performed using G\*Power 3.1.9.2

|                                                                         | <b>Pre OFTT</b> | <b>Post OFTT</b> |
|-------------------------------------------------------------------------|-----------------|------------------|
| TMAO, $\mu\text{mol/L}$                                                 | $4.1 \pm 2.3$   | $5.6 \pm 4.1$    |
| t tests - Means: Difference between two dependent means (matched pairs) |                 |                  |
| Input: Tail(s) = Two                                                    |                 |                  |
| Effect size dz                                                          | =               | 0.5077237        |
| $\alpha$ err prob                                                       | =               | 0.05             |
| Power (1- $\beta$ err prob)                                             | =               | 0.80             |
| Output: Noncentrality parameter $\delta$ = 2.9166506                    |                 |                  |
| Critical t                                                              | =               | 2.0369333        |
| Df                                                                      | =               | 32               |
| <b>Total sample size</b>                                                | =               | <b>33</b>        |
| Actual power                                                            | =               | 0.8073483        |
|                                                                         | <b>Pre OGTT</b> | <b>Post OGTT</b> |
| TMAO, $\mu\text{mol/L}$                                                 | $4.0 \pm 2.1$   | $3.5 \pm 2.1$    |
| t tests - Means: Difference between two dependent means (matched pairs) |                 |                  |
| Input: Tail(s) = Two                                                    |                 |                  |
| Effect size dz                                                          | =               | 0.8694009        |
| $\alpha$ err prob                                                       | =               | 0.05             |
| Power (1- $\beta$ err prob)                                             | =               | 0.80             |
| Output: Noncentrality parameter $\delta$ = 3.1346695                    |                 |                  |
| Critical t                                                              | =               | 2.1788128        |
| Df                                                                      | =               | 12               |
| <b>Total sample size</b>                                                | =               | <b>13</b>        |
| Actual power                                                            | =               | 0.8202666        |

## Supplemental Data Files

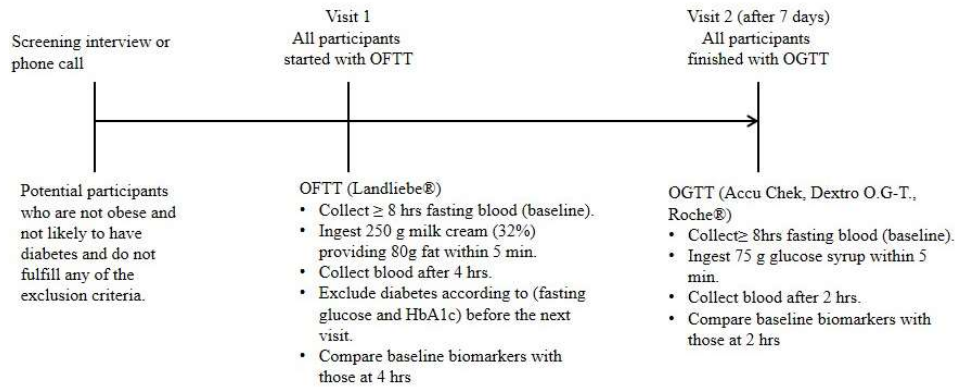

**Supplemental Figure 1.** Study flow diagram.

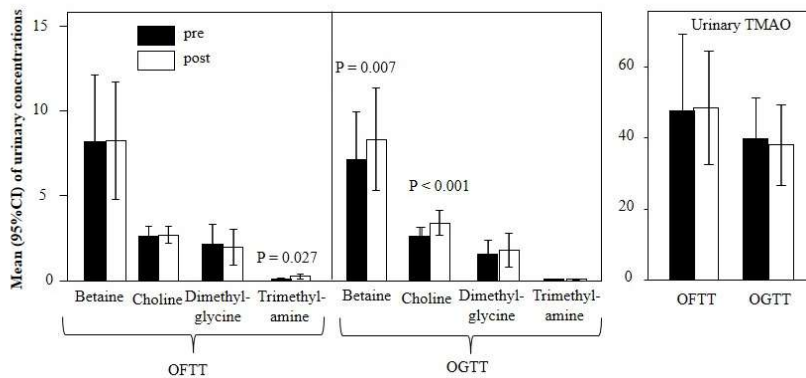

**Supplemental Figure 2.** Mean and 95%CI of urinary concentrations of the metabolites (all are  $\mu\text{mol}/\text{mmol}$  creatinine) before and after OFTT and OGTT. Urinary trimethylamine increased from baseline after OFTT, and urinary betaine and choline increased after OGTT compared with fasting concentrations. Urine samples were collected before OFTT and OGTT, 4 hours after OFTT, and 2 hours after OGTT. Concentrations of betaine and choline in urine were higher after OGTT as compared with those after OFTT.

## Supplemental Data Files

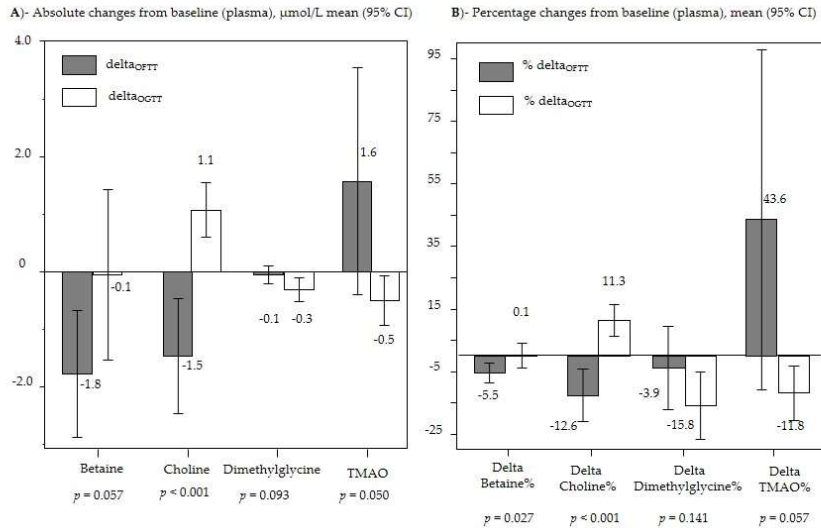

**Supplementary Figure 3.** A)- DeltaOFTT and deltaOGTT of plasma concentrations of betaine, choline, dimethylglycine, and TMAO. The delta was calculated as (post-test concentrations – pre-test concentrations). B)- the percentage changes of the metabolic markers from baseline. The percentage changes were calculated as: (post-OFTT levels – pre-OFTT levels)\*100/pre-OFTT levels or (post-OGTT levels – pre-OGTT levels)\*100/pre-OGTT levels. P values are according to paired t-test.

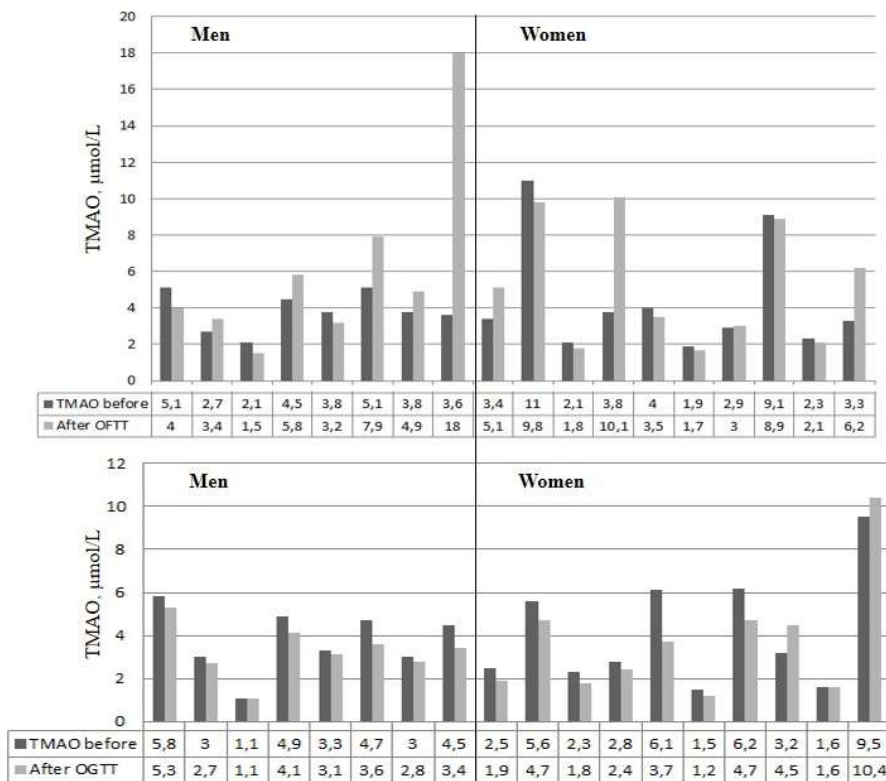

**Supplementary Figure 4.** Individual TMAO levels (in µmol/L) measured at baseline (before) and after OFTT or OGTT separated according to sex.

Supplemental Data Files

| Summary post OFTT                             | Summary post OGTT                              |
|-----------------------------------------------|------------------------------------------------|
| ↓ Choline                                     | ↑ Choline                                      |
| ↓ Betaine                                     | = Betaine                                      |
| = Dimethylglycine                             | ↓ Dimethylglycine                              |
| ↑ Betaine/choline                             | ↓ Betaine/choline                              |
| ↑ TMAO (↑ <sub>n=9</sub> + ↓ <sub>n=9</sub> ) | ↓ TMAO (↓ <sub>n=15</sub> + ↑ <sub>n=3</sub> ) |
| ↓ Choline/TMAO                                | ↑ Choline/TMAO                                 |
| ↓ Glucose                                     | = Glucose                                      |
| = SAM                                         | ↓ SAM                                          |
| ↑ Triglycerides                               |                                                |
| ↑ Urinary trimethylamine                      | = urinary trimethylamine                       |
| = Urinary betaine                             | ↑ Urinary betaine                              |
| = Urinary choline                             | ↑ Urinary choline                              |

**Supplemental Figure 5.** Summary of the significant changes (or tendencies up to  $\leq 0.10$ ) in plasma metabolites after applying oral fat tolerance test and oral glucose tolerance test.
